# Supplementary material
Source: PubMed Central journal article supplement (PMC5161214)
Supplement: jciinsight-1-90240-s001.pdf [file jciinsight-1-90240-s001.pdf]

## Supplemental Tables

**Supplemental Table 1.** Examples of hypoxia-inducible genes, whose expression levels are reversed by propranolol

| Illumina ID  | Gene Symbol  | Gene Name                                                                                 |
|--------------|--------------|-------------------------------------------------------------------------------------------|
| ILMN_2135798 | NR2C2AP      | nuclear receptor 2C2-associated protein                                                   |
| ILMN_1733863 | Fam100a      | family with sequence similarity 100, member A                                             |
| ILMN_2325168 | ARRB1        | arrestin, beta 1                                                                          |
| ILMN_1705753 | C3orf26      | chromosome 3 open reading frame 26                                                        |
| ILMN_1704571 | FAM53B       | family with sequence similarity 53, member B                                              |
| ILMN_1686664 | MT2A         | metallothionein 2A                                                                        |
| ILMN_1776147 | C21orf59     | chromosome 21 open reading frame 59                                                       |
| ILMN_1660554 | VWA1         | von Willebrand factor A domain containing 1                                               |
| ILMN_2409642 | Tro          | trophinin                                                                                 |
| ILMN_1775823 | POFUT2       | protein O-fucosyltransferase 2                                                            |
| ILMN_1766264 | PI16         | peptidase inhibitor 16                                                                    |
| ILMN_2205350 | LOC100131149 | NADH dehydrogenase (ubiquinone) 1 alpha subcomplex, assembly factor 4; similar to HSPC125 |
| ILMN_2205350 | Ndufa4       | NADH dehydrogenase (ubiquinone) 1 alpha subcomplex, assembly factor 4; similar to HSPC125 |
| ILMN_1698020 | DLC1         | deleted in liver cancer 1                                                                 |
| ILMN_1803772 | POLD4        | polymerase (DNA-directed), delta 4                                                        |
| ILMN_1702363 | Sulf1        | sulfatase 1                                                                               |
| ILMN_2391150 | FILIP1L      | filamin A interacting protein 1-like                                                      |
| ILMN_2126832 | Sec24a       | SEC24 family, member A (S. cerevisiae)                                                    |
| ILMN_1767542 | THAP10       | THAP domain containing 10                                                                 |
| ILMN_2133799 | Acat2        | acetyl-Coenzyme A acetyltransferase 2                                                     |
| ILMN_1682015 | GAL          | galanin prepropeptide                                                                     |
| ILMN_1776157 | SEPT4        | septin 4                                                                                  |
| ILMN_1705814 | KRT80        | keratin 80                                                                                |
| ILMN_1743402 | Six4         | SIX homeobox 4                                                                            |
| ILMN_1844593 | MST131       | MSTP131                                                                                   |
| ILMN_2104356 | COL1A2       | collagen, type I, alpha 2                                                                 |
| ILMN_1675612 | BLCAP        | bladder cancer associated protein                                                         |
| ILMN_1779257 | CD40         | CD40 molecule, TNF receptor superfamily member 5                                          |
| ILMN_1755711 | C17orf68     | chromosome 17 open reading frame 68                                                       |

**Supplemental Table 2.** KEGG pathway analysis of transcripts reversed by propranolol under hypoxia

| KEGG Pathway Term                   | Count | $-\log(P\text{-Value})$ | $P\text{-Value}$ | Genes                                                                                                                  |
|-------------------------------------|-------|-------------------------|------------------|------------------------------------------------------------------------------------------------------------------------|
| Focal adhesion                      | 16    | 3.791795423             | 1.62E-04         | <i>ACTB, COL4A2, COL3A1, MYLK2, CAPN2, BIRC2, MYL9, ACTG1, CCND1, LAMA3, ITGA6, CCND2, ITGAV, COL1A2, PDGFC, THBS1</i> |
| ECM-receptor interaction            | 8     | 2.270517195             | 0.005363926      | <i>COL4A2, LAMA3, ITGA6, ITGAV, COL3A1, COL1A2, THBS1, SDC2</i>                                                        |
| Small cell lung cancer              | 8     | 2.270517195             | 0.005363926      | <i>CCND1, COL4A2, LAMA3, ITGA6, ITGAV, RARB, BIRC2, MYC</i>                                                            |
| Glycolysis / Gluconeogenesis        | 6     | 1.745700858             | 0.017959703      | <i>TPI1, LDHA, LOC100133042, PFKP, BPGM, GAPDH, GAPDHL6, ALDH3A2, TPI1P1</i>                                           |
| NOD-like receptor signaling pathway | 6     | 1.689516197             | 0.020440137      | <i>IL8, MAPK14, CXCL2, RIPK2, TNFAIP3, BIRC2</i>                                                                       |
| p53 signaling pathway               | 6     | 1.534734574             | 0.029192106      | <i>CCND1, CCND2, GADD45G, GADD45B, THBS1, IGFBP3</i>                                                                   |
| Dilated cardiomyopathy              | 7     | 1.528905604             | 0.029586555      | <i>ACTG1, ACTB, ADCY4, ITGA6, ITGAV, TPM1, TGFB2</i>                                                                   |
| Glutathione metabolism              | 5     | 1.420342093             | 0.037989004      | <i>ODC1, G6PD, GGCT, IDH1, MGST1</i>                                                                                   |
| Arginine and proline metabolism     | 5     | 1.34116415              | 0.045586458      | <i>ODC1, ASS1, NAGS, AMD1, ALDH3A2</i>                                                                                 |
| Hypertrophic cardiomyopathy (HCM)   | 6     | 1.18386797              | 0.065483522      | <i>ACTG1, ACTB, ITGA6, ITGAV, TPM1, TGFB2</i>                                                                          |
| Vascular smooth muscle contraction  | 7     | 1.180002862             | 0.066068909      | <i>KCNMA1, ADCY4, CALD1, MYLK2, PLCB1, ITPR3, MYL9</i>                                                                 |
| hsa05219:Bladder cancer             | 4     | 1.040051898             | 0.091190186      | <i>CCND1, IL8, THBS1, MYC</i>                                                                                          |
| Regulation of actin cytoskeleton    | 10    | 1.008811446             | 0.097991534      | <i>ACTG1, ACTB, ITGA6, ITGAV, SSH2, MYLK2, RRAS, PDGFC, MYH9, MYL9</i>                                                 |
| Cell cycle                          | 7     | 1.001445768             | 0.099667653      | <i>CCND1, CCND2, GADD45G, PCNA, GADD45B, MYC, TGFB2</i>                                                                |

**Supplemental Table 3.** Percent phosphorylation of  $\beta_2$ AR sites at 21% or 2% oxygen, or with isoproterenol (ISO)

| Site           | Peptide                      | % Phosphorylated   |                   |             | Fold change       |          |
|----------------|------------------------------|--------------------|-------------------|-------------|-------------------|----------|
|                |                              | 21% O <sub>2</sub> | 2% O <sub>2</sub> | ISO         | 2% O <sub>2</sub> | ISO      |
| S246           | FHVQNLpSQVEQDGR              | 8±2.3              | 4.0±1.6           | 4.6±1.7     | ↓ 2.0             | ↓ 1.7    |
| S262           | RSpSKFCLK                    | 99±0               | 98±0.6            | 98±1.4      | NC                | NC       |
| S261+S262      | RpSpSKFCLK                   | 0.45±0.29          | 0.53±0.19         | 1.6±0.42    | NC                | ↑ 4.9    |
| S346           | RRSpSLKAYGNGYSSNGNTGEQSGYHV  | 1.02±0.78          | 1.53±1.72         | 0.65±0.92   | NC                | NC       |
| S355,S356      | AYGNGYpSpSNGNTGEQSGYHVEQEK   | 0.098±0.00         | 0.16±0.04         | 15±0.6      | ↑ 1.6             | ↑ 153    |
| S355,S356,T360 | AYGNGYpSpSNGNpTGEQSGYHVEQEK  | 0                  | 0                 | 0.39±0.25   | NI                | ISO only |
| S355,S356,S364 | AYGNGYpSpSNGNTGEQpSGYHVEQEK  | 0                  | 0                 | 0.079±0.006 | NI                | ISO only |
| S396           | LLCEDLPGTEDFVGHQGTVPpSDNIDSQ | 0.045±0.06         | 0.3±0.2           | 0.3         | ↑ 6.7             | ↑ 6.7    |

NC, no change; NI, not identified

<sup>¶</sup> Identified in two of three independent experiments.

Data are mean±S.D.
